# Supplementary material for: Two Tabata cycles in a single training set maximize fat oxidation after exercise in male college students with overweight/obesity
Source: Sci Rep. 2025 Sep 30;15:34011. doi: 10.1038/s41598-025-13526-x (PMC12484575; doi:10.1038/s41598-025-13526-x)
Supplement: Supplementary file 1 — Supplementary Information. [file 41598_2025_13526_MOESM1_ESM.xlsx]

## Sheet: Sheet1
10minF1	10minG1	10minE1	10minF2	10minG2	10minE2	10minF3	10minG3	10minE3	10minF1instant	10minG1instant	10minE1instant	10minF2instant	10minG2instant	10minE2instant	10minF3instant	10minG3instant	10minE3instant	20minF1	20minG1	20minE1	20minF2	20minG2	20minE2	20minF3	20minG3	20minE3	20minF1instant	20minG1instant	20minE1instant	20minF2instant	20minG2instant	20minE2instant	20minF3instant	20minG3instant	20minE3instant	30minF1instant	30minG1instant	30minE1instant	30minF2instant	30minG2instant	30minE2instant	instant	30minG3instant	30minE3	30minF1	30minF2	30minF3	30minG1	30minG2
0.44054	16.2251	26.3151	0.740678	11.6835	31.6639	0.524434	14.4308	31.4122	0.0506636	0.565297	1.46263	0.0521452	0.363925	1.66655	0.0437648	0.264025	1.8427	1.71424	14.176	39.7167	2.3554	12.887	49.7827	1.77142	11.6406	42.427	0.0608436	0.211525	1.36232	0.0865833	0.180974	1.86178	0.104634	0.181657	1.35869	0.0714931	0.197467	1.40897	0.115104	0.231433	1.89476	0.0959998	0.207498	1.67546	1.46778	2.51132	2.5624	16.6132	15.2937
0.45	19.6548	42.2072	0.85	18.1715	45.7723	0.701957	18.3218	43.2337	0.114902	0.468471	2.83182	0.110954	0.42131	2.61788	0.090043	0.670183	3.35705	3.6063	24.1345	71.7071	3.77422	21.3305	74.2711	2.69637	20.476	72.0737	0.189097	0.236297	2.65288	0.208517	0.0668146	2.19787	0.249566	0.0724258	2.56312	0.239776	0.123997	2.6341	0.280707	0.108044	2.61766	0.2482	0.117486	2.65867	6.01528	6.78557	4.71199	30.0899	27.4131
0.555517	23.6657	55.7847	0.732661	17.0001	47.3661	0.754153	12.3329	43.741	0.0666474	0.927889	3.73758	0.098703	0.594932	3.15537	0.0926334	0.642968	3.21953	2.73924	21.4117	75.1866	3.64382	29.6051	80.1859	2.94568	18.8564	75.3495	0.15584	0.233158	2.31289	0.274158	0.137721	3.07701	0.252542	0.148142	2.13074	0.140507	0.234545	2.05308	0.180425	0.246741	2.08623	0.165835	0.139446	2.01926	6.08028	4.87274	4.65459	44.0923	24.9294
0.55	33.5271	48.5588	0.4872	19.9487	50.1459	0.838405	15.9706	48.13	0.0521312	0.88794	3.7703	0.164239	0.302659	2.66994	0.149195	0.739967	2.66818	2.42684	44.3281	82.3322	3.4079	20.0031	75.3895	2.68946	21.8437	79.2729	0.159608	0.304894	3.00494	0.220891	0.130413	2.0904	0.211554	0.2426	2.36682	0.224511	0.0671312	2.19075	0.268665	0.0561491	2.18556	0.244209	0	1.96519	6.0941	5.27154	5.56931	26.781	35.1857
0.55	20.2345	40.3728	0.757194	13.7757	42.4864	0.497631	8.30948	39.0538	0.043251	0.790101	2.48747	0.0351194	0.299298	2.45167	0.0357194	0.726191	2.67858	1.91435	26.3259	61.7266	2.36514	11.0757	65.1965	2.12178	12.8543	62.3364	0.0847604	0.173758	1.44383	0.130412	0.153977	1.77946	0.134679	0.160299	1.84665	0.0990531	0.251802	1.8821	0.179685	0.152535	1.55657	0.147151	0.180579	1.58449	3.10777	2.95417	2.17059	31.1567	24.6533
0.679202	24.5311	48.6978	0.860092	18.3838	53.6724	0.859464	15.1222	50.3173	0.0679202	0.448846	3.01476	0.208476	0.426337	3.14642	0.180987	0.229352	3.15108	3.12551	31.32	78.7529	4.30622	24.5313	86.7024	3.78475	21.9268	82.3761	0.210427	0.0734551	2.29902	0.268201	0.129861	2.67653	0.221597	0.111514	2.07265	0.171942	0.091216	1.94412	0.296594	0.093428	2.0727	0.23183	0.108393	2.53696	5.1558	7.22568	5.57875	33.2087	32.6363
0.397716	28.1108	50.2789	1.01451	18.1017	50.462	0.841549	19.7386	52.8328	0.0597716	0.652212	2.58439	0.136004	0.22541	2.12231	0.101215	0.328859	2.19441	1.72773	36.4354	78.2309	3.22558	23.413	79.0183	2.65707	23.3257	80.8148	0.131526	0.272187	2.1191	0.25617	0.120858	2.35563	0.243802	0.128864	1.92376	0.170266	0.0945988	1.3586	0.206147	0.0992235	1.91851	0.196165	0.103143	1.82751	4.12272	5.45927	5.02826	37.9341	23.5641
0.723897	19.6088	45.4727	0.889984	12.9146	43.3855	0.958963	14.6836	44.6222	0.109144	0.482238	2.82209	0.198399	0.455384	2.92887	0.133791	0.243468	2.74955	3.03406	24.734	74.8322	3.29056	18.5755	73.6564	3.11951	15.4942	74.4517	0.18599	0.190996	2.49545	0.315565	0.128815	2.46647	0.328788	0.127067	2.45044	0.186959	0.362552	2.19301	0.28641	0.132838	2.74944	0.200501	0.185791	1.86751	5.89937	5.59325	5.7933	29.3948	24.8637
0.568812	17.4552	41.3421	0.866457	12.835	43.6247	1.09785	9.55899	42.319	0.0929018	0.499264	2.7312	0.135542	0.3209	2.75792	0.117985	0.43817	2.7902	2.49597	23.3971	71.3587	2.95627	19.5965	73.603	3.06383	12.3407	74.9801	0.161542	0.186056	2.58122	0.231476	0.111817	2.52	0.159233	0.239507	2.41336	0.142751	0.256291	2.47091	0.279148	0.205545	2.80711	0.200874	0.169539	2.86583	4.12189	4.68747	4.83569	26.8929	22.0755
0.761922	10.347	37.931	1.37344	11.2769	40.587	1.36573	11.7841	35.1644	0.106779	0.316659	2.72332	0.125627	0.484677	2.87682	0.142581	0.571517	2.67088	4.14046	14.9599	67.8666	4.74217	15.4713	67.834	2.84846	14.6131	68.5777	0.286077	0.237544	2.39411	0.275226	0.196735	2.08612	0.219564	0.184278	2.29412	0.133813	0.249836	2.08831	0.184568	0.129137	1.89879	0.159945	0.234169	2.3686	2.11641	2.39881	2.27653	14.1313	15.8679
0.390162	14.607	38.6801	1.29306	11.5263	36.7898	0.746847	11.4641	39.2772	0.143801	0.478784	2.14674	0.165041	0.434037	2.22943	0.166452	0.560082	1.92191	1.68964	19.3826	58.3028	2.86539	15.7242	59.741	2.02718	13.4176	57.9008	0.128465	0.194376	1.90804	0.215766	0.147728	2.15716	0.0931812	0.222016	2.07912	0.322685	0.0811411	2.69109	0.325401	0.133381	2.37537	0.238838	0.0111537	2.29526	5.10462	6.4987	4.74487	21.5363	21.0929
0.475077	13.8063	30.6181	1.21578	11.081	31.9489	0.714012	11.754	30.0187	0.0613761	0.629301	2.92218	0.157134	0.459868	3.19385	0.120713	0.511281	2.78394	3.15642	24.0304	63.7426	3.63107	16.3253	63.4795	3.28084	17.9361	62.0996	0.141011	0.303328	2.45555	0.217817	0.170505	2.61509	0.197746	0.21351	2.61417	0.0897221	0.231101	1.70218	0.188133	0.2363	1.89517	0.149389	0.247084	2.23121	3.21608	4.34621	2.46503	21.3064	20.3641
0.34499	12.7577	34.9457	0.526668	11.0757	33.0143	0.526354	12.5159	34.3782	0.123973	0.463296	1.89328	0.178673	0.314348	2.19498	0.146312	0.419766	1.98845	1.9282	15.1771	54.2871	2.9633	14.0666	57.7451	2.47375	14.8895	57.0832	0.0794087	0.275829	1.7754	0.229379	0.184241	1.95251	0.166675	0.183037	1.77049	0.201957	0.170606	2.46006	0.316227	0.0136659	2.63478	0.27582	0.134037	2.53353	5.55391	6.59046	4.61072	27.4517	17.7789
0.4593	14.3248	37.2636	0.380178	12.5231	35.6386	0.214886	13.1865	37.7875	0.0597843	0.570588	2.72231	0.096991	0.434712	2.79624	0.101896	0.493146	2.61847	1.93684	19.1578	57.5315	2.31262	16.4446	55.0301	2.01189	18.1656	56.3554	0.0792279	0.276837	1.7792	0.142488	0.19132	1.82459	0.174685	0.274655	1.81486	0.148034	0.0798072	1.88114	0.242477	0	2.14923	0.126246	0.164906	1.84084	4.13932	5.65201	3.19086	15.3213	18.9947
0.373068	14.7855	41.6102	0.701523	10.1886	41.7766	0.771373	12.2253	41.4101	0.0651898	0.418759	2.18444	0.109274	0.272167	2.04221	0.113306	0.434723	2.68648	2.11241	34.1076	62.9048	3.40305	24.1135	62.4287	2.42141	20.6348	64.8011	0.13557	0.138018	1.76724	0.270181	0.0767416	2.03032	0.0700541	0.312572	2.35761	0.150912	0.113698	1.84126	0.0963881	0.193933	1.62816	0.0904051	0.297729	1.96201	4.42871	4.43913	2.41271	21.5826	20.922
0.494555	23.145	46.6217	1.26185	15.2528	46.8283	1.26424	15.7918	46.0557	0.0819843	0.561874	2.65664	0.167466	0.316712	2.68222	0.174245	0.266587	2.62792	2.11544	28.7882	72.889	3.29066	21.1547	76.5706	3.36274	21.6052	71.1319	0.118255	0.269267	2.11519	0.24858	0.120764	2.05358	0.117919	0.159565	2.19421	0.162408	0.113961	1.94435	0.190353	0.157372	2.36828	0.178068	0.186829	2.36416	3.81441	4.6524	3.71417	16.9312	15.9681
0.260072	20.1194	45.1685	0.529393	17.9802	45.7448	0.315963	17.7893	44.3812	0.0678161	0.617027	2.85464	0.118855	0.355885	2.78797	0.101412	0.432721	2.70476	2.02955	25.0787	70.9229	2.37289	22.1949	71.2317	2.15433	23.5683	70.1312	0.148949	0.235023	2.58159	0.184789	0.195049	2.23379	0.0930767	0.341603	2.14893	0.191958	0.129084	2.27705	0.206317	0.0596464	2.07498	0.223225	0.0431436	2.12375	4.03993	5.56186	5.13174	35.2128	35.1896
0.519977	22.0771	44.596	0.793906	15.7881	44.4216	1.09169	12.5079	41.7956	0.0999877	0.581373	2.10705	0.107803	0.385804	2.65913	0.0901041	0.413513	2.43373	2.68304	25.0873	63.8348	3.11778	19.2379	71.6616	3.01242	17.171	66.6916	0.106038	0.266689	2.25224	0.230788	0.141269	2.3284	0.135459	0.196803	2.34773	0.197867	0.161371	2.4823	0.234304	0.114146	2.61637	0.154185	0.265058	2.43488	4.49186	4.35899	3.11766	23.1041	25.1506
0.35766	22.7055	44.2777	1.08183	14.6344	46.2582	0.871385	12.8771	47.5225	0.0617596	0.56397	2.13177	0.147299	0.427839	2.81242	0.132004	0.394476	2.70714	2.77145	23.1236	64.7009	3.32326	19.2659	68.1611	2.86113	17.8224	72.8992	0.110554	0.228119	2.13334	0.266985	0.17684	2.07416	0.194738	0.235701	2.2337	0.174928	0.208969	2.00244	0.230694	0.168689	2.2881	0.179161	0.200899	1.85596	4.54646	5.02349	4.03291	30.4845	26.6582
0.529415	22.2073	44.3301	0.690414	14.3456	40.132	0.885416	15.3717	43.0793	0.0764995	0.530815	2.91642	0.110303	0.356849	2.52533	0.107444	0.586193	2.69	2.32779	24.8966	63.8891	3.28207	21.2657	66.0194	3.03868	20.0824	65.0771	0.109296	0.242841	2.44869	0.211983	0.175165	2.21659	0.152598	0.202964	2.24844	0.15635	0.098738	1.84992	0.240336	0.0915626	1.90341	0.138966	0.0953072	1.85601	4.65718	4.98879	3.43248	32.8566	26.2627
0.532344	14.183	47.1512	0.843157	11.4474	42.0029	0.795084	12.068	48.673	0.098786	0.523986	2.33025	0.114206	0.421279	2.65047	0.122302	0.460715	2.66304	2.91892	25.9095	67.9104	3.03911	19.1055	72.1914	3.05232	20.729	65.2732	0.15225	0.259137	2.49744	0.243443	0.183629	2.51011	0.177637	0.196547	2.14861	0.163702	0.186887	2.04279	0.23388	0.162782	2.14868	0.215594	0.0891806	2.21767	4.43889	5.10348	4.03214	31.5486	19.1265
0.604691	21.8391	36.8197	1.06079	16.5134	39.7195	1.03967	15.2981	44.1517	0.0729419	0.484438	2.5199	0.153676	0.455296	2.61353	0.147369	0.485976	2.85623	2.1349	27.76	64.4202	3.0505	20.6255	71.9942	2.94919	20.192	69.4334	0.180802	0.265143	2.15684	0.255056	0.184631	2.30622	0.187854	0.243656	2.21514	0.160979	0.194605	1.85282	0.202238	0.114526	2.20409	0.114405	0.191916	2.38077	4.43244	5.23545	4.02132	28.4562	23.2682
0.524393	22.3934	37.4728	0.666779	15.0284	41.5823	0.88576	14.9893	37.3935	0.0609848	0.471104	3.00179	0.166083	0.42917	2.31433	0.176312	0.43791	2.70323	2.6843	27.9531	63.873	3.13992	20.5198	66.2124	2.91957	19.2563	67.0969	0.132119	0.207014	2.18121	0.20817	0.174612	2.35476	0.172993	0.233383	2.21557	0.179317	0.202691	1.97498	0.181387	0.168768	2.36031	0.113198	0.193726	2.11045	4.34434	5.23213	4.08924	27.4562	21.6186
0.436584	23.3064	45.747	0.813352	15.4022	43.0496	0.741266	14.7261	46.105	0.0659337	0.567617	2.20675	0.0958673	0.469007	2.44939	0.101037	0.501629	2.65825	2.83312	26.2322	67.8401	3.26506	21.2664	66.6796	3.09664	17.3271	70.4785	0.104058	0.208252	2.04152	0.232327	0.172195	2.13316	0.168156	0.196575	2.32972	0.176757	0.0967869	1.7738	0.214803	0.144822	2.01232	0.183209	0.136362	2.25512	4.32323	4.98213	3.93215	29.5957	25.6168
0.61539	21.3828	36.7302	0.705574	15.3113	39.1657	1.09802	14.6246	36.2492	0.0814525	0.599707	2.6155	0.117345	0.318952	3.06961	0.110579	0.532125	2.60942	1.67121	25.7621	68.4034	3.20747	20.4256	65.9425	2.89418	18.0484	72.6998	0.158797	0.202381	2.48922	0.235069	0.172452	2.50688	0.146294	0.221908	2.31053	0.158893	0.108766	2.04298	0.19092	0.0854316	2.36455	0.136618	0.17834	1.88209	4.52321	5.43242	3.93218	30.8465	23.1682
0.435144	14.5655	46.8035	1.02693	14.0303	40.8347	0.532167	15.1416	45.0245	0.0624539	0.506542	2.2189	0.160703	0.44824	2.63815	0.17993	0.46094	2.676	2.61996	24.7054	68.7258	3.32498	22.6881	71.1034	2.83765	19.297	67.2769	0.128242	0.269329	2.16993	0.217469	0.171097	2.11249	0.151751	0.225017	2.36986	0.171171	0.201151	1.97146	0.248097	0.12382	2.26189	0.105255	0.119114	2.29817	4.42944	5.12444	4.43414	31.4189	24.4652
0.469489	15.7367	45.4994	0.965745	11.3682	41.4623	0.783954	15.5765	44.238	0.0835616	0.523947	2.50526	0.150859	0.406884	2.87425	0.15488	0.496653	2.69554	2.45217	27.4263	66.8978	3.28093	21.893	68.2141	3.05971	20.188	66.5525	0.177196	0.232043	2.02137	0.224629	0.164738	2.5836	0.135373	0.228205	2.32212	0.168726	0.0928704	1.88136	0.187868	0.108907	2.19492	0.11709	0.117212	1.82294	4.43218	5.03657	4.53443	32.1872	25.1682
0.525302	17.415	47.3684	0.789834	13.7324	46.2997	0.471862	11.4108	45.4122	0.0787221	0.548473	2.68503	0.12747	0.452775	2.63307	0.116721	0.389846	2.33894	1.91695	23.8264	67.7878	3.14807	19.3361	70.1965	2.91308	20.7102	72.485	0.120747	0.228314	2.0773	0.237405	0.188479	2.07436	0.162198	0.208267	2.29613	0.157455	0.0855943	1.73088	0.184002	0.167439	2.117	0.14257	0.157005	2.26051	4.44324	5.06443	4.43214	28.9489	24.1652
0.556382	17.7613	39.5091	0.865576	16.6389	41.8433	0.967746	13.0609	37.639	0.0685903	0.567273	2.29818	0.145148	0.421677	2.78874	0.138037	0.590408	2.6296	3.02998	25.393	67.1172	3.09325	19.8582	72.3763	2.90301	16.7106	66.9248	0.115667	0.249659	2.532	0.255187	0.206044	2.04681	0.158744	0.223288	2.18371	0.178257	0.185854	2.01813	0.211651	0.0885147	2.29043	0.147172	0.147719	2.04531	4.43433	5.01244	4.44342	27.4892	23.1869
0.551337	20.301	39.0352	1.17933	16.0078	39.6498	1.08245	15.6574	43.8007	0.0945621	0.651653	2.91644	0.135604	0.39064	2.87108	0.144597	0.418478	2.62227	2.04173	24.8017	68.9623	3.26976	20.1915	69.5796	2.90949	20.2256	69.9692	0.154361	0.24555	2.59111	0.24679	0.191703	2.07126	0.146359	0.19035	2.34435	0.16589	0.217783	2.28007	0.199537	0.168043	1.9607	0.101505	0.222006	2.21773	4.43343	5.03432	4.52121	23.4896	19.1862
0.510021	22.5721	38.9715	1.15077	14.4842	43.5134	0.633952	11.278	37.2521	0.0915441	0.585346	2.66003	0.139799	0.427646	2.62062	0.149721	0.498766	2.67019	2.61996	23.1236	54.2871	3.0505	19.2379	66.0194	2.42141	17.9361	66.6916	0.171268	0.292155	2.61354	0.294643	0.218444	2.14469	0.194844	0.214844	2.44565	0.174937	0.185953	1.81975	0.201487	0.138862	1.9392	0.181094	0.120679	2.10883	4.44324	5.05423	4.53241	27.6848	21.2168
0.478238	22.0771	45.747	0.793906	15.7881	46.2582	0.88576	14.9893	37.3935	0.0678161	0.530815	3.00179	0.114206	0.316712	2.45167	0.176312	0.739967	2.66818	2.78788	25.4847	60.4865	3.45648	21.6168	69.4864	2.62565	19.1847	69.6483	0.184865	0.234344	2.56487	0.244864	0.228443	2.24849	0.206468	0.229845	2.33468	0.191958	0.170606	1.88114	0.190353	0.0992235	2.08623	0.196165	0.200899	2.53696	4.40434	5.02344	4.43247	27.6846	19.2653
[truncated: 13 more columns]
